# Supplementary material for: Continuous wavelet transform and the Euler deconvolution method and theirapplication to magnetic field data of Jharia coal field, India
Source: Copernicus journal article supplement (doi:10.5194/gi-2016-22), 2016-08-23
Supplement: Supplementary file [file gi-2016-22-RC3-supplement.pdf]

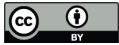

# CONTINUOUS WAVELET TRANSFORM AND EULER DECONVOLUTION METHOD AND THEIR APPLICATION TO MAGNETIC FIELD DATA OF JHARIA COAL FIELD, INDIA

5  
6  
7  
8  
9

Arvind Singh and Upendra Kumar Singh

Department of Applied Geophysics, Indian School of Mines, Dhanbad, India-826004

## 1. Abstract

This paper deals the application of Continuous Wavelet Transform (CWT) and Euler deconvolution methods to estimate the source depth using magnetic anomalies.

These methods are utilised mainly to focus on the fundamental issue for mapping the major coal seam and locating lineaments. These methods are tested and demonstrated on synthetic data and finally applied on field data from Jharia coal field. Prepared magnetic anomaly map that reflects clear tectonics control and nature of the underlying basement, demarcation of the basin, geological faults by steep gradients of magnetic anomaly. Analysis suggests that the CWT have a great utility in the magnetic data interpretation and the correlation between magnetic anomalies and geological features such as faults/joints and intrusive bodies over the basin. The CWT provides the consistent and reliable depth of the underlying basement with the results of Euler deconvolution and Tilt-depth methods without any priory information that is correlated well with borehole samples (Raja Rao, 1987).

One of the fundamental issues is to detect differences in susceptibility and density between rocks that contain ore deposits or hydrocarbons or coal. These differences are reflected in the gravity and magnetic anomalies and also delineation of structural features, which are interpreted using several techniques (Blakely and Simpson, 1986). One of the most important objective in the interpretation of potential field data is to improve the resolution of underlying source, delineating lateral change in magnetic susceptibilities that provides information not only on lithological changes but also on structural trends.

# Summary of Comments on gi-201622\_jharia\_arvind-annoated.pdf

---

Page: 1

---

 Number: 1      Author: sanjay      Subject: Highlight      Date: 10/25/2016 11:04:07 AM  
CWT technique can be use

---

 Number: 2      Author: sanjay      Subject: Sticky Note      Date: 10/23/2016 1:09:29 PM  
what does mean by magnetic lineaments?  
lineaments is a geological feature so magnetic lineaments is related to what?

---

 Number: 3      Author: sanjay      Subject: Highlight      Date: 10/23/2016 1:08:05 PM

---

 Number: 4      Author: sanjay      Subject: Sticky Note      Date: 10/23/2016 1:21:02 PM  
pl explain that how basement structure or tectonic control can be find with intensity anomaly map.

---

 Number: 5      Author: sanjay      Subject: Highlight      Date: 10/23/2016 1:09:59 PM

---



Especially, mapping the edges of causative bodies is fundamental to the application of potential field data to geological mapping. The edge detection techniques are used to distinguish between different sizes and different depths of the geological discontinuities (Cooper and Cowan 2006, 2008; Perez et al. 2005; Ardestani 2010; Hsu et al. 1996, 2002; Holschneider et al., 2003). The derivatives of magnetic data are used to enhance the edges of anomalies and improve significantly the visibility of such features.

<sup>1</sup>Sedimentary layer dominates the gravity and magnetic signature over Jharia Coal field (Verma et al., 1973, 1976, 1979). <sup>2</sup>ends the difference between the depths estimated using Euler deconvolution method (EDM) (Thompson 1982; Reid et al. 1990) and Tilt Depth Method (TDM) technique (Salem et al., 2007; Cooper 2004, 2011) may help to detect the thickness of the coalbed. Wavelet transform and Euler deconvolution method has been theoretically demonstrated on magnetic data. These methods provide source parameters such as the location, depth, geometry of geological bodies and interfaces in an easy and effective way. However, it may be more difficult to characterize the source properties in cases of extended sources (Sailhac et al., 2009).

These methods executed over Jharia coal field, Dhanbad, India. This area forms an east west trending belt of Gondwana basin of Damodar valley at the north eastern part of India. This study region is mostly coal rich area of Gondwana basin. Analysis on Jharia coal field suggests that the magnetic anomalies provide encouraging results which are well correlated with available gravity data and some borehole informations.

51

## 52 2. Geology of Jharia coal field

Geology of the Jharia coal basin is shown in Fig. 1. The basin has been formed because of crustal subsidence during Gondwana periods (Fox, 1930). The coal field have extension along the east west direction in Gondwana basin of Damodar valley at the north eastern part of the India. Gondwana basin is surrounded by crystalline gneisses of several categories from all the directions. Sedimentary strata have the inclination away from the gneiss contact in this region. The sedimentary strata include the rocks which belong to Talchir, Raniganj series, Barren-measures formation and Barakar series (Verma et al, 1979). Raniganj series, Barakar series and Talchir series including barren measures formation covers area about 58 km<sup>2</sup>, 218 km<sup>2</sup> and 181 km<sup>2</sup> respectively. Various formations are shown in the Figure 1.

---

 Number: 1      Author: sanjay      Subject: Highlight      Date: 10/24/2016 9:37:50 AM

---

 Number: 2      Author: sanjay      Subject: Sticky Note      Date: 10/24/2016 9:38:13 AM  
incomplete sentence.

---

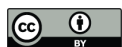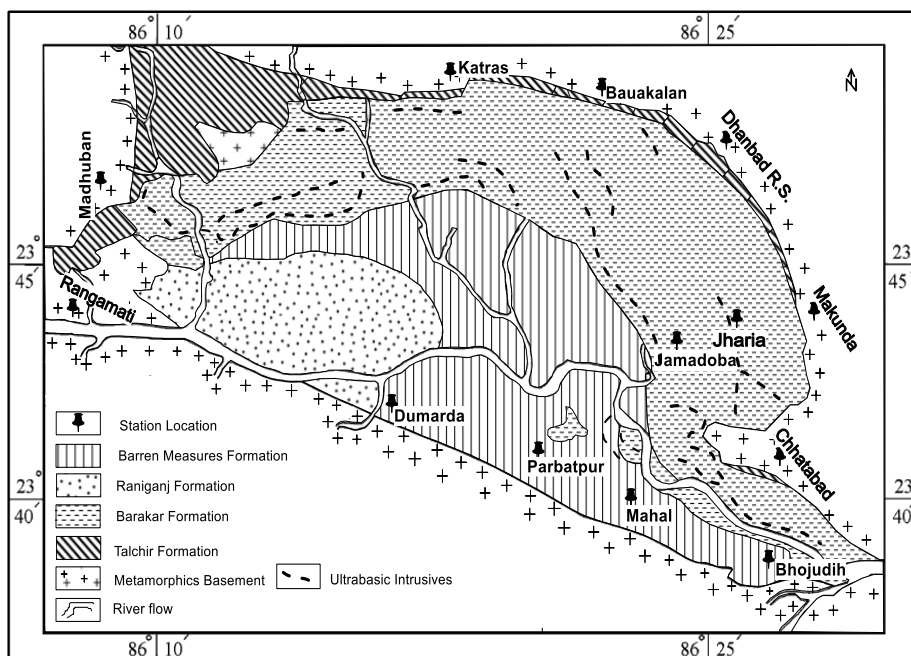

63  
 64 Figure 1: Geological map of Jharia coal field and surrounding regions,  
 65 (after Verma et al, 1979)  
 66

67 Talchir and Barakar formation rest over northern margin and having dip towards  
 68 the southern margin. Barakar Series covers northern half of this coal field. Barakar series  
 69 produces the best quality coal in India. An elliptical outline is formed by Raniganj  
 70 formation in south western region of the coal field. Geology of the Jharia coal field has  
 71 been divided into many blocks like Parbatpur block, Mahuda block, Jarma and Monidih  
 72 block etc. There are many faults exist over Jharia coal field. A normal tensional fault  
 73 exists over the southern boundary. In the south western part of the basin Damodar river  
 74 (Fig. 1) flows very close to the southern boundary fault (Verma et al, 1973, 1979, Verma  
 75 and Ghosh, 1974).

76

This page contains no comments

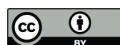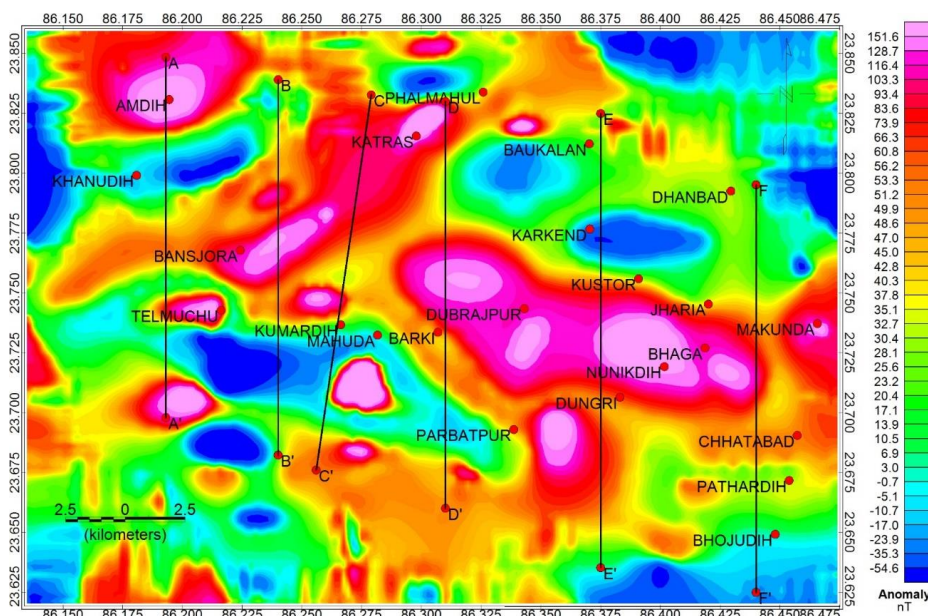

Figure 2: Total magnetic field anomaly (nT) map and location of the profiles over Jharia coal field and surrounding regions (after Verma et al., 1979).

The Magnetic data has been obtained from Verma et al (1979) to study the region. After, all necessary corrections, we prepared the total magnetic anomaly map with the help of magnetic data of this province as shown in Fig. 2. The map shows very sharp and irregular pattern outcrops, while over the basin the variations of magnetic anomalies are smooth and the northern part of the basin the magnetic anomalies over this region suggest that basin is identical to a curve. In the southern part, the anomalies are fairly parallel to the southern boundary fault and there is no clear indication of the trend of the anomalies in the south eastern part, which is probably due to its irregular faulting associated with Pathardih horst. Obviously the anomaly map reflects the sediments have been highly folded and faulted and coal seams have been highly deformed. A noticeable part of the magnetic anomaly is the presences of major anomalous source, which are ascribed to some features within the Precambrian basement underlying sediments.

---

 Number: 1      Author: sanjay      Subject: Sticky Note      Date: 10/24/2016 10:06:52 AM

---

there are so many doubt about magnetic map.

is magnetic data is collected by author or used from verma et al 1979.

if verma et al then what correction has appiled in processed data.

what does mean by help of magnetic data?

what does mean by outcrops?

how directly magnetic map depicted about folding and faulting and most important about deformed?

the magnetic data can only depicts the high and low and gradient which can be due to heterogeneities present in the studies area.

rewrite the section.

---

 Number: 2      Author: sanjay      Subject: Highlight      Date: 10/24/2016 9:58:28 AM

---



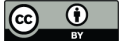

### 96 3. Methodologies

#### 97 3(a). Continuous Wavelet Transform

98 The continuous wavelet transform is the conversion of any signal into matrix  
 99 made of sum scalar products in Fourier space. Wavelet Transform method for potential  
 100 field has been established by Moreau et al. (1997, 1999). This method previously used  
 101 for homogeneous, isolated and extended potential field sources (Sailhac et al., 2009).  
 102 Chamoli (2006); Cooper (2006); Goyal and Tiwari (2014); Singh and Singh (2015) used  
 103 wavelet transform method on various synthetic as well as on field data. Method allows  
 104 Poisson group of wavelets as a mother wavelet in order to interpret the potential field  
 105 data. To analyse the signal by mother wavelet, a wavelet domain signal is decomposed  
 106 into the orthogonal wavelets of finite duration. The CWT coefficient  $W_t$  of a measured  
 107 potential  $t(x)$  is defined as the convolution product.

$$108 \quad W[\psi, t](p, o) = \int_{R^n} \frac{1}{o^n} t(x) \psi \left[ \frac{p-x}{o} \right] dx \quad (1)$$

$$109 \quad W[\psi, t](p, o) = (D_o \psi * t)(p) \quad (2)$$

110 where  $\psi$  ( $x \in R^n$ ) is the wavelet to be analysed;  $x$  denotes the abscissa along the  
 111 particular profile line;  $t(x)$  indicates the potential field (gravity or magnetic anomaly);  
 112 ( $o \in R^+$ ) and  $p$  are the dilation and position parameter respectively. Dilation parameter  
 113 allows analysing wavelet to act as a band pass filter. Dilation operator  $D_o$  can be termed  
 114 as

$$115 \quad D_o \psi(x) = \frac{1}{o^n} \psi \left( \frac{x}{o} \right) \quad (3)$$

116 dilation  $D_o$  fulfils two properties given below

$$117 \quad (i) \quad W[\psi, D_\lambda t](p, o) = \frac{1}{\lambda^n} W[\psi, t] \left( \frac{p}{\lambda}, \frac{o}{\lambda} \right) \quad (4)$$

118 above equation states that the main mathematical asset of wavelet transform (i.e.  
 119 covariance of wavelet transforms with respect to the dilation) and

120  
 121 (ii) Homogeneous function  $t$  of degree  $\sigma \in R$  can be define as

$$122 \quad t(\lambda, x) = \lambda^\sigma t(x) \forall \lambda > 0 \quad (5)$$

This page contains no comments



123 after correlation equations (4) and (5) result homogeneous function (i.e. by recalling  $\sigma =$   
 124  $n$  and  $\sigma = 0$ , respectively)

$$125 \quad (\lambda p, \lambda o)W[\psi, t] = \lambda^\sigma W[\psi, t](p, o) \quad (6)$$

126 Equation (6) represents that wavelet transform of a homogeneous function is  
 127 analogous to dilation and scale of any function  $W(\psi, t)(p, o = \text{constant})$  of the wavelet  
 128 transform. Moreau et al., (1999) suggest that the combinations of straight lines creates a  
 129 cone like outline at the location where  $\left(\frac{\partial^m}{\partial p^m}\right)W(\psi, t)(p, o) = 0$  and apex of the outline is  
 130 the centre of homogeneity of the analysed function. The outlines in the Fig. (3) fulfils the  
 131 condition  $\left(\frac{\partial^m}{\partial p^m}\right)W(\psi, t)(p, o) = 0$  are known as edges of wavelet transform or modulus  
 132 maxima lines.

133 Potential field signal analysed by CWT allows for estimation of depth and  
 134 homogeneous distribution order of the source generating the analysed signal. Source  
 135 depth is calculated through the intersection of the converging extrema lines (Fig. 3). In  
 136 addition to this, Moreau et al. (1997, 1999) established the Poisson semi group kernel  
 137  $K_o(x)$ , which allows to carry on the harmonic field  $t(x, z)$  from level  $z$  to the level  $z+o$ ,  
 138 and expressed as upward continuation (Bhattacharyya, 1972).

$$139 \quad P_o(x) = \frac{o}{\pi} \left( \frac{1}{o^2 + x^2} \right) \quad (7)$$

140 For wavelet analysis, let us consider a local homogeneous source  $x = 0$  having depth  
 141  $z = z_\alpha$ , of a potential field  $t(x, z = 0)$ . Moreau (1999) stated that the wavelet coefficients  
 142 of positions and dilations lie in the upper half plane follow a twice scaling rule with two  
 143 exponent parameters. Moreau (1997) explained the relationship between wavelet  
 144 coefficients at two altitudes and for any wavelets of homogeneous sources as

$$145 \quad W[\psi, t](p, o) = \left(\frac{o}{o'}\right)^\gamma \left(\frac{o' + z_\alpha}{o + z_\alpha}\right)^\beta W\left(p \frac{o' + z_\alpha}{o + z_\alpha}, o'\right) \quad (8)$$

146 Where  $\beta = \gamma - \sigma - 2$  indicates the holder exponent,  $o$  and  $o'$  denote different altitudes  
 147 while  $z_\alpha$  signifies the depth of the causative source. Equations (6) and (8) have additional  
 148 value in dilation and scaling in right hand side causes geometrical conversion of equation

This page contains no comments

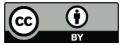

(8). Due to geometrical conversion the cone like outline joins at source depth because of the negative dilation  $\alpha = -\gamma$ . Therefore, Poisson group of wavelets used on potential field demonstrate modest assets and can be applied to find the causative source without any prior information. CWT gives an idea to describe edges of the extended body. Also, it offers quick and consistent results about extended and isolated source depth with location. Wavelet analysis plays key role in depth estimation of potential field. When order of  $\gamma$  increases then obtained source depth appears shallower. For  $\gamma=1$ , outlines of the cone have the point of intersection at barycentre of the prismatic source. CWT can resolve the noisy and non-stationary dataset very well (Moreau; 1997, 1999) and magnetic data can also be analysed without any reduction to pole.

### 3(b). Euler deconvolution Method

Euler deconvolution was first developed for interpretation of magnetic profile data by Thompson (1982) and later Reid et al. (1990) extended its approach to gridded magnetic data. Reid et al. (1990) developed the special case for magnetic field of a contact of finite depth extent and coined the term “Euler deconvolution”. Klingele et al. (1991) and Zhang et al. (2000) used it over gravity vertical gradient and tensor gravity gradient respectively. Moreover, it has been generalised by Mushayandebvu et al. (2001, 2004) and Rawat (1996) executed further to investigate the wider range of source nature. Since then, it has been adapted and improved to interpret the gravity data by Keating (1998). Euler Deconvolution Method (EDM) makes rapid depth estimations from magnetic and gravity data in grid form using Euler’s homogeneity relation (Thompson, 1982; Reid et al., 1990; Barbosa et al., 1999). Euler deconvolution is insensitive to magnetic inclination, declination and remanent magnetisation and is very suitable for 3D analyses (Keating, 1998; Mushayandebvu et al., 2004; Stavrev and Reid, 2007; Melo et al., 2013, Silva, et al., 2001).

The global acceptance of Euler deconvolution is mainly due to its simplicity of implementation and use, making it the tool of choice for a quick and reliable tool of interpretation for potential field data (FitzGerald et al., 2004; Gerovska and Arauzo Bravo, 2003) and to find the source information in terms of depth and geological structure. Euler deconvolution uses three orthogonal gradients of any potential quantity

This page contains no comments



as well as the potential quantity itself to determine depths and locations of a source body. This method primarily responds to the gradients in the data and effectively traces the edge and defines the depth of the source body. Reid et al., (1990) and Thompson (1982) defined the 3-D Euler equation as.

$$(x - x_0) \frac{dF}{dx} + (y - y_0) \frac{dF}{dy} + (z - z_0) \frac{dF}{dz} + NF = 0 \quad (9)$$

Where  $(x_0, y_0, z_0)$  is the location of magnetic source whose total magnetic field  $(F)$  is observed at  $(x, y, z)$ . The values  $\frac{dF}{dx}$ ,  $\frac{dF}{dy}$  and  $\frac{dF}{dz}$  are the measured magnetic gradients along the x, y, and z directions. Euler deconvolution adds an extra dimension to the interpretation. It estimates a set of  $(x, y, z)$  points that, ideally, fall inside the source of the anomaly. Euler deconvolution requires the x, y, and z derivatives of the data and a parameter called the structural index (SI)  $N$  ( $N$  is non-negative integer). SI defines the anomaly attenuation rate at the observation point and depends on the geometry of the source. The SI is an integer number that is related to the homogeneity of the potential field and varies for different fields and source types (Stavrev and Reid, 2007; Barbosa et al., 1999 and Melo et al., 2013). For example, in the case of total field magnetic anomaly data, a dike is represented by an SI of 1, whereas a sphere is represented by an SI of 3.

The source points that are calculated as solutions by EDM are positioned at the estimated edge of the susceptibility inhomogeneities. Thus, the EDM relies on the derivatives of the magnetic data, the resulting depth estimates relate mainly to the areas of basement heterogeneities identified as distinct sources of the field. The first vertical gradient of magnetic data is calculated by using the fast Fourier transform (FFT) method (Gunn, 1975). The vertical and horizontal derivatives of the first vertical gradient, essential for the calculation of Eq. (9), are also been calculated using the FFT method. The horizontal source locations from EDM solutions can be used for explanation of lithological and structural trends. A location in the map where these solutions tend to make cluster is considered to be the most probable location of the source.

Equation (9) can be explained in terms of least square to estimate the source coordinates and structure. Since the absolute value anomalous field  $(F)$  is barely identified

This page contains no comments





so equation (9) cannot be used directly over the observed data. Moreover, according to Thompson, (1982) equation (9) does not explain the regional or background magnetic field due to adjacent source, so obtained solutions may be unreliable and may vary from their accurate location.

For 2-D model, estimation of total magnetic field (F) and its derivatives at all points of data value provide the linear equation with unknown coordinates ( $x_0$ ,  $z_0$ ), where  $x_0$ ,  $z_0$  represents location and depth of the magnetic source respectively. Using Taylor series unidentified regional field (E) can be described as follows

$$E(x, y) = E_0 + x \frac{\partial E}{\partial x} + y \frac{\partial E}{\partial y} + K(2) \quad (10)$$

Where  $E_0$  and  $K(2)$  represent the constant background for definite window and other higher order values in Taylor series expansion. The resultant anomalous field (F) can now be specified as the difference between the observed magnetic field (O) and regional magnetic field (E).

$$F = O - E \quad (11)$$

Now after revision modified Euler equation can be specified as

$$O \equiv (x - x_0) \frac{d(O - E)}{dx} + (y - y_0) \frac{d(O - E)}{dy} + (z - z_0) \frac{d(O - E)}{dz} + N(O - E) = 0 \quad (12)$$

According to Thompson (1982), Silva et al. (2003) and Reid et al. (1990), Euler equation provides satisfactory results by considering the first order term in Taylor series expansion. Also, Euler equation converts nonlinear and is resolved linearly by supposing tentative values of the structural index (Stavrev, 1997). Higher order term of Taylor series expansion provides the solution when singular points are closely spaced to each other (e.g. in the case of the multiple fracture, sill etc.). In this case postulation of linear background discontinues and needs higher order terms of Taylor series expansion for reasonable result.

Dewangan et al. (2007); Gerovska, and Arauzo Bravo (2003) chose the second order terms of the Taylor series expansion and favour to procedure of rational calculation in which the infinite Taylor series expansion is estimated by two polynomials (one lies in numerator and other one in denominator). Kopal (1961) suggested that the maximum accuracy in rational calculation may be possible when the polynomials of numerator and

This page contains no comments



denominator holds the same power. The rational function is used to calculate the background, this function can be defined as

$$E(x, y) = \left( \frac{E_0 + ax + by}{1 + cy + dy} \right) \quad (13)$$

Where, a, b, c, d and  $E_0$  are the unknown parameter. Comparison of the value of equation (13) and equation (12) generates another nonlinear Euler equation which provides the source depth, location and structural index (Coleman and Li, 1996, Williams et al., 2003). All the variation on Euler deconvolution includes working through profile as well as gridded data set using moving window (each window position is a set of linear equation which generates the solution to locate the source in plan and depth). The advantage of this method is that source magnetization direction and its result are not affected by the presence of remanence (Ravat, 1996). Moreover, it can be further used as inversion algorithm and the design rules based on mathematical analysis are proposed by Reid et al. (2014) must be considered to analyse the potential field (gravity and magnetics).

254

#### 255 **4. Modelling and Inversion of Gravity and Magnetic data**

It is difficult to separate two anomaly sources with conventional method when the spatial scales of the sources are similar. Therefore, in order to explore new sources, it is necessary to study the inversion method and technique of two layer interfaces for potential fields (gravity and magnetic). If the basement consists of both a density and a magnetic interface, significant tectonic information about the source depth can be revealed through joint gravity and magnetic inversion by including the information of magnetic basement, minimizing the inversion ambiguity, and enhancing the inversion reliability.

Joint gravity and magnetic inversion methods started by Bott and Ingles (1972) by using an equivalent layer approach to find the variation in magnetization and density ratio of sources at the latter stage of the last century. Moreover, Menichetti and Guillen (1983) used a generalized inversion method to define sources shape for the 2.5D case. Zeyen and Pous (1993) deliberate the joint inversion problem on the basis of a priori information such as density, susceptibility and remnant magnetization of buried source. Zhang et al. (1993) established a method to invert gravity and magnetic data of the same

---

|                                                                                   |           |                |                           |                             |
|-----------------------------------------------------------------------------------|-----------|----------------|---------------------------|-----------------------------|
|  | Number: 1 | Author: sanjay | Subject: Replacement Text | Date: 10/24/2016 1:34:59 PM |
|-----------------------------------------------------------------------------------|-----------|----------------|---------------------------|-----------------------------|

---

what new source?

|                                                                                   |           |                |                           |                             |
|-----------------------------------------------------------------------------------|-----------|----------------|---------------------------|-----------------------------|
|  | Number: 2 | Author: sanjay | Subject: Replacement Text | Date: 10/24/2016 1:34:42 PM |
|-----------------------------------------------------------------------------------|-----------|----------------|---------------------------|-----------------------------|

---

inversion is not a method.

|                                                                                   |           |                |                           |                             |
|-----------------------------------------------------------------------------------|-----------|----------------|---------------------------|-----------------------------|
|  | Number: 3 | Author: sanjay | Subject: Replacement Text | Date: 10/24/2016 1:46:51 PM |
|-----------------------------------------------------------------------------------|-----------|----------------|---------------------------|-----------------------------|

---

Not clear.

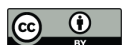

270 layer with density and magnetism and developed a general linear integral inversion  
271 method. Gallardo Delgado et al. (2003) extended the 3D approach to include a density  
272 variation with depth and the magnetization direction as unknown parameters. In order to  
273 determine the topography of an interface of constant density and magnetization contrast  
274 a damped least squares method was used by Pilkington (2006) for joint inversion of  
275 gravity and magnetic data.

276 Wu et al. (2007) proposed the concept of a joint gravity and magnetic inversion  
277 of a variable density interface which better matches with actual geologic conditions.  
278 Practically, it is difficult to describe the nature of the misfit function or cost function as it  
279 relates to the results and appraisal of geophysical inverse problem. Fernandez Martinez  
280 et al., (2012, 2013) described the uncertainty in linear and nonlinear least squares inverse  
281 problems and proposed new insights to understand uncertainty in inverse problem very  
282 effectively. Jiang Fan et al. (2008) proposed and explain the effectiveness of the method  
283 of joint gravity and magnetic inversion for two layer models by associating the thickness  
284 changes and position of the middle layer and anomaly.

285

## 286 **5. Application of CWT to Synthetic Magnetic Anomaly**

287 The synthetic examples demonstrate the application of the CWT technique on the  
288 magnetic anomaly due to isolated and extended homogeneous magnetic sources at the  
289 position at 300 m having depth about 20 m. First analysis (shown in Fig. 3) corresponds  
290 to the magnetic anomaly of a finite length vertical dipole. The wavelet coefficients of  
291 magnetic field due to vertical dipole computed with the help of wavelet is shown in this  
292 figure (for horizontal derivative  $\gamma=1$ ) which shows a cone like structure. Wavelet  
293 transform of the potential field due to homogeneous source follows a geometrical  
294 property which allows an easy estimation of source depth and location. The examples  
295 demonstrated could correspond to the zero remanent magnetization with all  
296 magnetization being induced. To understand the behaviour of the modulus maxima of  
297 CWT over of the magnetic anomaly due to the anomalous sources, the CWT is presented  
298 for various field examples. The converging point of ridges gives depth and location of the  
299 vertical dipole.

300

This page contains no comments

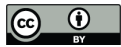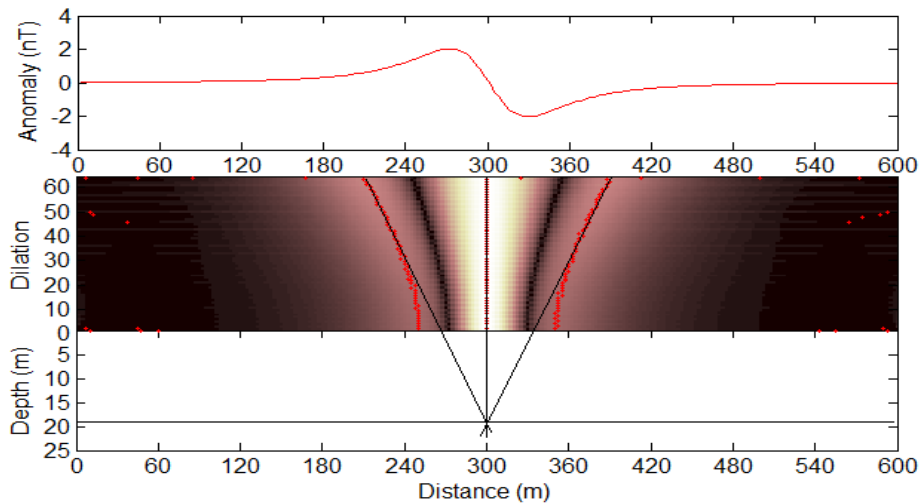

Figure 3: Synthetic magnetic anomaly of isolated extended source and depth estimation by Wavelet transform for a Poisson wavelet for  $\gamma=1$  with mathematical expression  $k(x) = -[x (2/\pi)] / (1+x^2)^2$ .

The wavelet coefficients are computed by applying CWT to the anomaly. Fig. 4 shows the calculated values of CWT coefficients for different dilations (1-64.5) of magnetic anomaly. The maxima of modulus of CWT provide cone like structures and are clearly shown which points towards the position of the upper corner of the model. On the other hand, whereas an approximate horizontal location has been estimated, an intersection of modulus maxima lines in the subsurface has placed below the base line ( $a=0$ ) to mark the depth of the source, where  $a$  is dilation.

Also, example illustrates the application of wavelet transform to potential fields (horizontal derivative,  $\gamma=1$ ) makes a cone like shape and ridges of the cone join below the base line or to homogeneity centre of the source, where y-scale represents the dilation. The point where ridges joins mark the depth and location and of the vertical dipole. It is detected that homogeneous source retains a geometrical possession after execution of wavelet transform on potential field. This makes a straightforward interpretation about depth and location of causative body. In order to perform wavelet analysis on field data, it has been tested on noisy data with 1%, 2%, 5%, 10% noise in the potential source data

This page contains no comments





321 obtained because of vertical dipole [Fig. 4 (a), (b), (c), (d)]. It is clear that Wavelet  
 322 analysis provides the exact depth and location of the source.

323

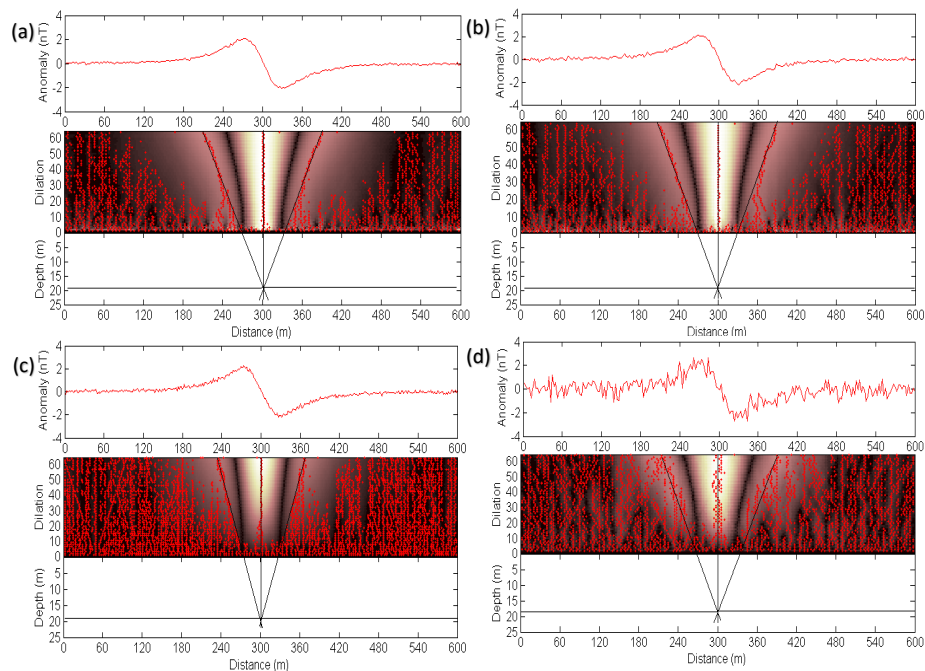

324

325 Figure 4: (a) magnetic anomaly with 1% noise (b) magnetic anomaly with 2% noise (c)  
 326 magnetic anomaly with 5% noise (d) magnetic anomaly with 10% noise. <sup>1</sup>

327

## 328 6. Application of CWT to magnetic field anomaly from Jharia coal field

329 The CWT and EDM are applied on field magnetic anomaly collected from Jharia  
 330 Coal Field and surrounding regions, Dhanbad, India. For CWT analysis six profiles (AA',  
 331 BB', CC', DD', EE' and FF') have been selected, which cover the entire coal field. <sup>2</sup>Fig. 2  
 332 shows the magnetic anomaly map, in which a number of anomalous sources such as  
 333 extension, direction of the bodies, geological faults/fold and tectonic signature has been  
 334 shown. These anomalies can be adequately explained by assuming an underlying body  
 335 having susceptibility contrast with respect to its surroundings and which is polarized in  
 336 N-S direction. The positive anomaly in the northern part of the basin is clearly seen in the  
 337 profile.

## Page: 13

---

 Number: 1      Author: sanjay      Subject: Sticky Note      Date: 10/24/2016 10:38:23 AM  
if noise level is more then 10% then still will we get the same convergence depth?  
if not then what maximum level accepted/resolve by present technique?

---

 Number: 2      Author: sanjay      Subject: Highlight      Date: 10/24/2016 10:39:06 AM

---

 Number: 3      Author: sanjay      Subject: Sticky Note      Date: 10/24/2016 10:43:53 AM  
remove the sentence.  
anomaly map only depicts high and low which might be possible relation with know surfacial geological structure and extended upto certain depth.  
magnetic anomaly map can not directly indication of tectonic signature.



338 The Remanence or remanent magnetization or residual magnetism of the body also  
 339 appears to contribute to the anomaly. ~~It is interesting to note that in the region of this~~  
 340 ~~magnetic anomaly a number of dykes and sills are found to be intrusive into the sediments~~  
 341 ~~as shown in Fig. 2. This anomaly therefore could be ascribed to the presence of a basic or~~  
 342 ~~ultrabasic body which could be source for the basic dykes and sills which intruded into~~  
 343 ~~the basin during Gondwana times. Alternatively, this anomaly could also represent a basic~~  
 344 ~~intrusive of Precambrian age underlying the sediments. There are practically no basic~~  
 345 ~~intrusive present in the region of positive anomaly. Therefore, this anomaly could be more~~  
 346 ~~definitely ascribed to an intrusive body of Precambrian age~~ Verma et al. (1979).

## 348 7. Results and discussion

349 In order to check the reliability of the interpreted results obtained from Euler  
 350 deconvolution, CWT and geological sections construction information collected from  
 351 published results of boreholes drilled by Geological Society of India (G.S.I.), Bharat  
 352 Coking Coal Limited (B.C.C.L.), National Coal Development Corporation (N.C.D.C.),  
 353 Central Mines Planning and Design Institute (C.M.P.D.I). Therefore, the depth to the  
 354 basement configuration inferred from gravity data as well as drilled borehole information  
 355 discussed below.

356 Jharia coalfield and surrounding areas have been considered to estimate the source  
 357 depths on the basis of technique of intersections of modulus maxima lines of CWT. The  
 358 mean depths of causative sources along the profile AA' (passes east of the Khanudih and  
 359 west of the Telmuchu and Bansjora region through Amdih over western most part of the  
 360 Jharia coal field, shown in Fig. 2) calculated from the CWT [Fig. 5 (i) (a)] and Daubechies  
 361 wavelet method [Fig. 5 (i) (b)] varies from 0.2 km to 0.45 km. Profile AA' shows that  
 362 there is fault near the north-western part of the basin.

363 Magnetic Field Inclination, Declination and Azimuth Angle (clockwise from True  
 364 North) of this profile are 36.44°, -0.11° and 268.48° respectively. Anomaly hike of about 77  
 365 nT between borehole JM-4 and JK-26 has been observed because of a number of basic  
 366 intrusive bodies belong to Satpura cycle exist over the area. Jharia coalfield consist of  
 367 peridotites in the forms of sills as well as dykes. Dolerite dykes are very common in  
 368 western part of this coalfield.

---

 Number: 1      Author: sanjay      Subject: Sticky Note      Date: 10/24/2016 12:33:20 PM  
remanance magnetization only effect the direction of magnetization and its gradient field.  
what is mean by residual magnetism and how its contibute the total magnetic field.  
provide the references.

---

 Number: 2      Author: sanjay      Subject: Cross-Out      Date: 10/24/2016 12:33:22 PM

---

 Number: 3      Author: sanjay      Subject: Inserted Text      Date: 10/24/2016 12:33:29 PM

---

 Number: 4      Author: sanjay      Subject: Replacement Text      Date: 10/24/2016 12:35:20 PM  
what does meant by intrusive into sediments.  
rewrite the sentence.

---

 Number: 5      Author: sanjay      Subject: Replacement Text      Date: 10/24/2016 12:37:16 PM  
it does not make any sense to discuss beyond the scope of present article.

---

 Number: 6      Author: sanjay      Subject: Replacement Text      Date: 10/24/2016 2:28:40 PM  
what does mean by hike?

---



369 Central part shows flat sedimentary region and magnetic anomaly shows high  
370 value on either side of the profile. Raniganj formation exists on southern side whereas  
371 Talchir formation exists on the northern side of this profile. However, the Barren-  
372 Measures and the Barakar formations are lies in between the Raniganj and the Talchir  
373 formations. There is an intrusion of Archean metamorphics in Talchir formation which  
374 shows as outcrop over the surface near Amdih [Fig 5 (ii)]. The some of the bore holes  
375 provide the information about the metamorphics along this profile. The maximum  
376 thickness of the sediment along this profile is observed about 0.8 km.

377 Bore holes JM-1, JM-4 and JK-26 are located close to this profile, which touches  
378 metamorphics at the depth about 0.4 km 0.55 km and 0.3 km respectively. These bore  
379 hole are located west of Bansjora and Telmuchu. The depth to the basement obtained  
380 from magnetic data is nearly equal to the depth obtained from gravity data along these  
381 profiles (Singh and Singh, 2015).

382

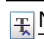

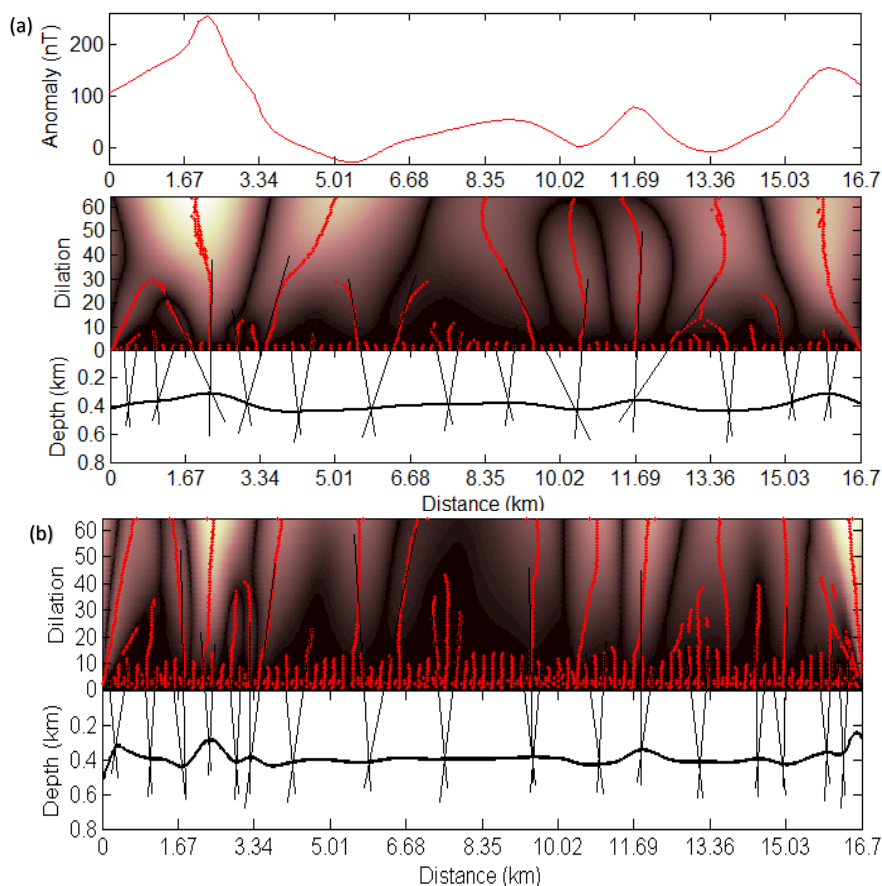

Figure 5 (i): (a) Magnetic anomaly across the profile AA' (drawn in Fig. 2) and depth estimation by Continuous Wavelet Transform, (b) Depth estimation by Daubechies wavelet.

This page contains no comments



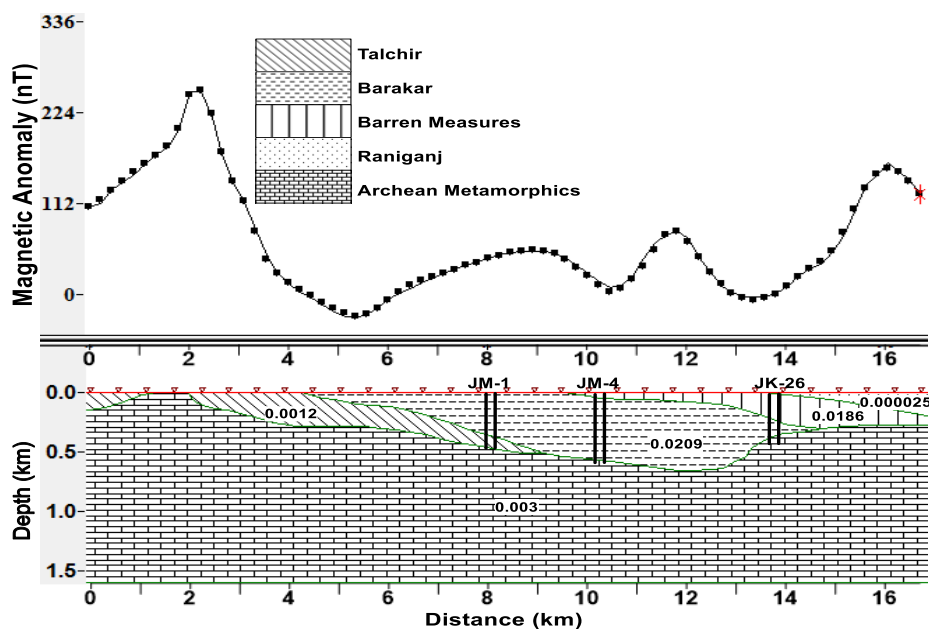

Figure 5 (ii): 2D-model of the Profile AA' drawn in Fig. 2.

The mean depths of causative sources along the profile BB' (passes east of Telmuchu and Bansjora and west of Kumardih region, shown in Fig. 2) calculated from the CWT [Fig. 6 (i) (a)] and Daubechies wavelet [Fig. 6 (i) (b)] varies from 1.3 km to 2.5 km. Central part of the basin shows the abrupt changes in the magnetic anomaly.

Profile BB' illustrates about the Barakar, the Raniganj, the Talchir and the Barren-Measures. The barren measures is found in between the Barakar and Raniganj formation which shows the outcrops in both sides of the Raniganj formation. Also, there is an intrusion of Talchir formation has been found in Archean metamorphics and Barakar formation at northern end of the profile [Fig. 6 (ii)]. There is a sloppy nature exist on both side of the profile. The major portion of this area is dominated by the Raniganj and the Barakar formations. The estimated thickness of the sediments is about 2.3 km over the Raniganj formation.

Magnetic Field Inclination, Declination and Azimuth Angle of this profile are 36.42°, -0.11° and 268.5° respectively. This profile passes through two faults between

This page contains no comments



408 ~~metamorphics and sediment~~<sup>1</sup>ne is at southern end while another one at northern end of  
409 the profile. ~~Faults are indicated by steep gradient of magnetic anomaly. There are~~  
410 ~~Gondwana basin trapes are normally magnetized. Raniganj formation infested with~~  
411 ~~numerous dykes and sills. Magnetic anomaly hike about 103 nT and 162 nT south east~~  
412 ~~and east of Bansjora represent the occurrence of Precambrian basement underlying he~~  
413 ~~sediments.~~<sup>3</sup>

414 <sup>4</sup>geological section along this profile BB' is deduced from analysis of gravity data,  
415 available geological information and bore hole information. The bore hole JK-7 and JM-  
416 8 are located near this profile. From the bore hole JM-7, it is obtained that maximum  
417 thickness of the Raniganj formation is about 0.220 km and Barren-Measures lies below  
418 it. It touches the Barakar formation at the depth about 1.2 km near east of Bansjora.  
419 Obtained results from JK-8, it is clear that sediment thickness is about 0.3 km and bore  
420 hole touches the Barren-Measures at the depth about 300 m.

421

## Page: 18

---

 Number: 1      Author: sanjay      Subject: Replacement Text      Date: 10/25/2016 6:59:00 AM  
fault is a well identified boundary where deformation can be seen. here what is meant by metamorphics and sediment?  
Author should mark the fault on geological map if it is reported. Figure 2 does not depict any geological fault. it is just a magnetic low surrounded by high.

---

 Number: 2      Author: sanjay      Subject: Replacement Text      Date: 10/25/2016 7:02:18 AM  
Rewrite the whole paragraph. it is too difficult to understand many buncombe terminology.

---

 Number: 3      Author: sanjay      Subject: Inserted Text      Date: 10/25/2016 6:59:56 AM

---

 Number: 4      Author: sanjay      Subject: Sticky Note      Date: 10/25/2016 7:05:45 AM  
it is worthless to mention about gravity interpretation.  
is the author has analysis the gravity data or took some information from published paper.

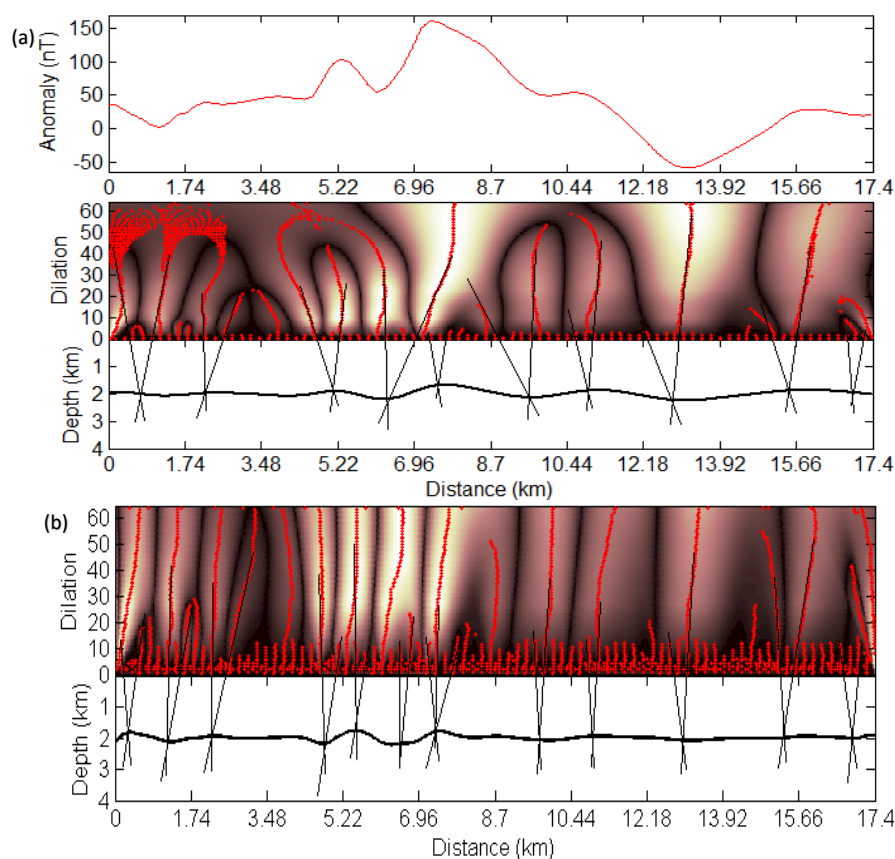

422

423

424 Figure 6 (i): (a) Magnetic anomaly across the profile BB' and depth estimation by

425 Continuous Wavelet Transform, (b) Depth estimation by Daubechies

426 wavelet.

This page contains no comments

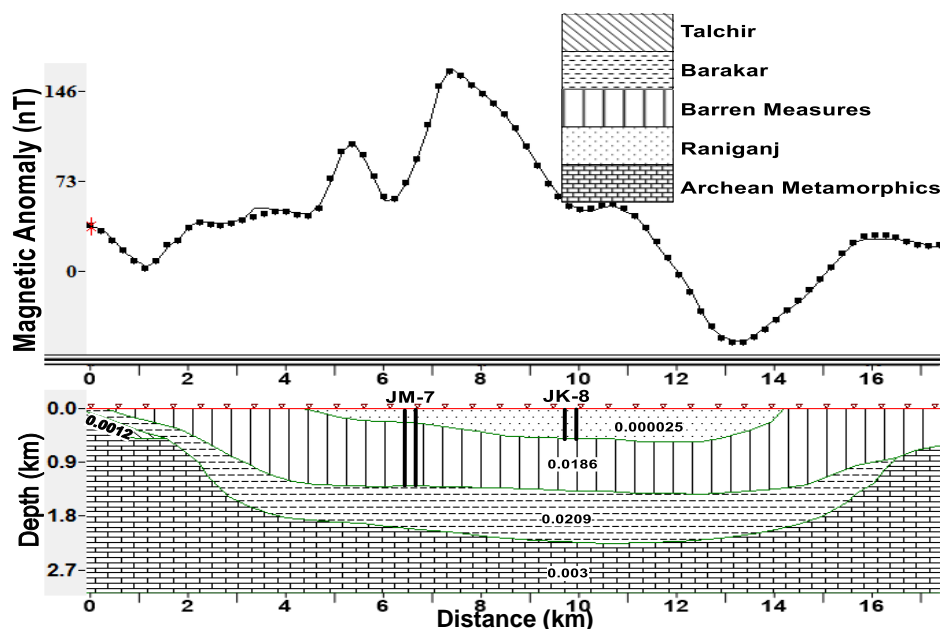

Figure 6 (ii): 2D-model of the Profile BB' drawn in Fig. 2.

The mean depths of causative sources along the profile CC' (passes west of Mahuda and Katras through Kumardih region, shown in Fig. 2) calculated from the CWT [Fig. 7 (i) (b)] and Daubechies wavelet method [Fig. 7 (i) (b)] varies from 1 km to 2 km. Northern part of the basin shows the flatness in the basin. Most of the sedimentary formations exist along the profile CC'. [Fig. 7 (ii)] reveals that there is a strong indication of both boundaries have slope towards the central part of the basin and the southern boundary is categorized by an abrupt slope than the northern.

Magnetic Field Inclination, Declination and Azimuth Angle of this profile are 36.41°, -0.12° and 268.516° respectively. Gee (1932) mentioned four dykes in the memoir of this coalfield, namely Salama dyke, Sitarampur dyke, Charanpur dyke and Barakar river dyke. The flow of the Barakar river has been shown in Fig. 1. It is remarkable that in this region of this magnetic anomaly profile numbers of ultrabasic dyke (mica peridotites) and sills are found as intrusive into sediments and Barakar formation causes magnetization of the body in the presents earth's field.



Number: 1

Author: sanjay

Subject: Replacement Text

Date: 10/25/2016 7:08:00 AM

The Northern





446            Similar to the Profile BB' Barren measures lies between the Raniganj and Barakar  
447            formation. Also, Talchir formation lies between the Barakar and Archean metamorphics  
448            whose thickness varies about 1.8 km to 2.2 km at north central part of the basin. The  
449            thickness of sediments near Kumardih and Mahuda is about 2.4 km. Moreover, geological  
450            sections along the profile CC' is also based on the results obtained from gravity data, bore  
451            hole information as well as geological information. Bore hole NCJA-4, NCJA-5 and MN-  
452            11 are located near this profile. Bore hole NCJA-4 and NCJA-5 are located south west of  
453            Katras and north east of Kumardih. Depth analysis of individual formation near deepest  
454            part of the basin are about 0.4 km for Raniganj formation, 0.95 km for Barren-Measures,  
455            0.8 km for Barakar formation and about 0.2 km for Talchir formation.

456  
457  
458  
459  
460



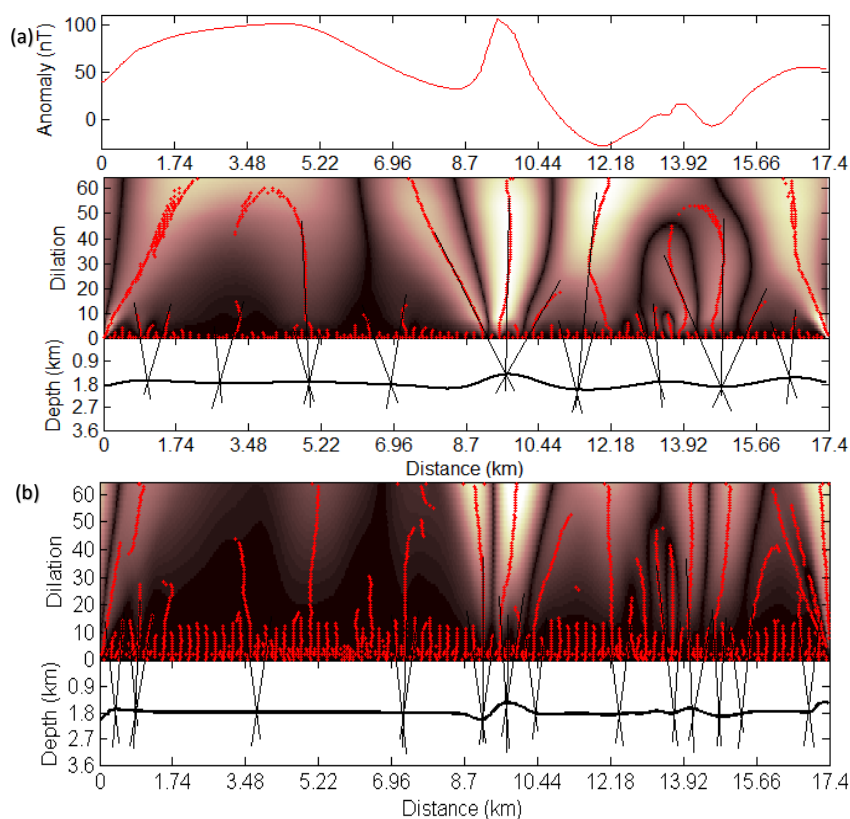

461

462

463 Figure 7 (i): (a) Magnetic anomaly across the profile CC' (drawn in Fig. 2) and depth

464 estimation by Continuous wavelet transform, (b) Depth estimation by

465 Daubechies wavelet.

466

This page contains no comments

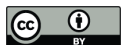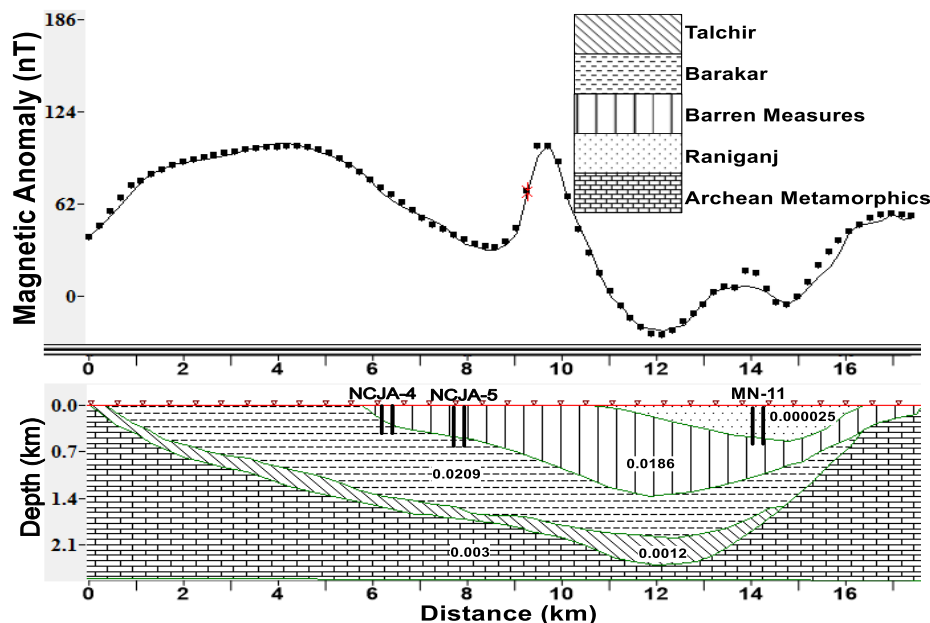

Figure 7 (ii): 2D model of the Profile CC' drawn in Fig. 2.

The mean depths of causative sources along the profile DD' (passes east of Mahuda and Katras and west of Parbatpur and Dubrajpur though Barki region, shown in Fig. 2) calculated from the CWT [Fig. 8 (i) (a)] and Daubechies wavelet method [Fig. 8 (i) (b)] varies from 1 km to 2.4 km. Also, along this profile there are some indication of fractious contact between the Barakar formation and Barren Measures. Barakar formation appear to pinch out close to the southern boundary fault.

Magnetic Field Inclination, Declination and Azimuth Angle of this profile are  $36.40^\circ$ ,  $-0.12^\circ$  and  $268.529^\circ$  respectively. Fault between Barakar formation and metamorphics are clearly indicated by steep gradients of magnetic anomaly at northern end of profile. Southern end of the profile characterized by magnetic variation appears due to an uneven topography. Middle of the profile characterized by a magnetic high of about 151 nT because of two dimensional linear feature and magnetic pole which lies nearly 0.5-0.65 km below the surface in this region. The extent of Talchir formation assumed to be underlying the Barakar formation is uncertain. Some coal seams exhibit on the surface and northern side have the steep dip than the southern side. Approximate depth of the

This page contains no comments

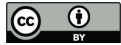

basement in this area estimated due to single pole at depth of about 2.0 km [Fig. 8 (ii)]  
 below the surface near south west of Parbatpur.

Geological sections along this profile also deduced from the analysis of bore hole  
 information, gravity data and geological information. Bore hole NCJA-14, JK-5 and  
 NCJP-32 are located south of Phalmahul, north west of Dubrajpur and west of Parbatpur  
 respectively. The individual maximum thickness of various formations near deepest part  
 of the of the basin are about 0.8 km for Talchir, 0.4 km for Barren-Measure and about 2  
 km for Barakar formation.

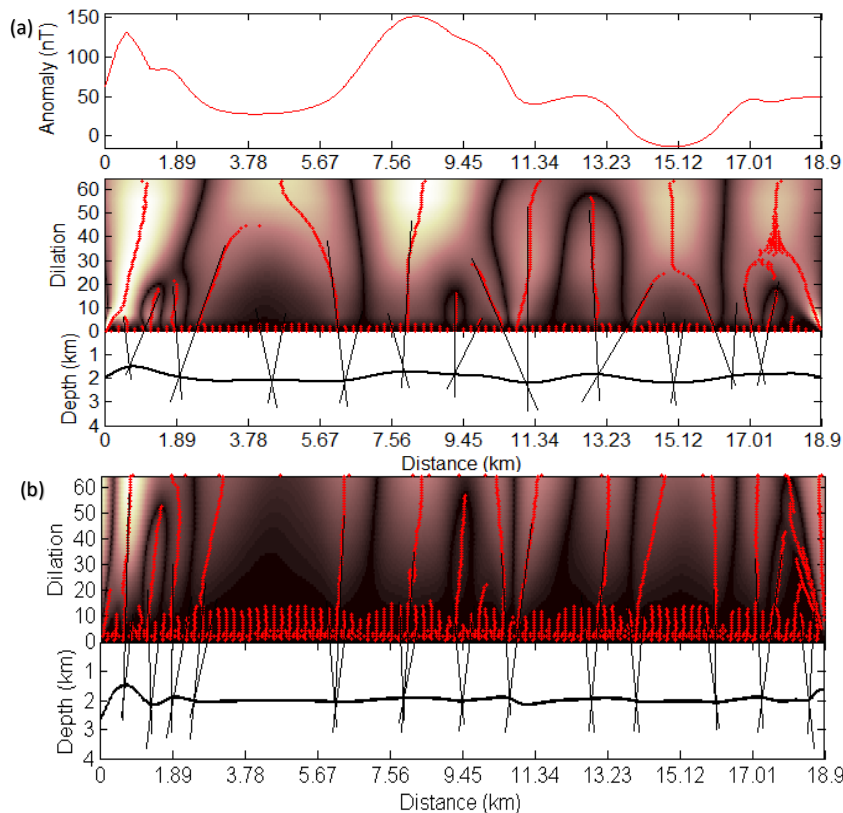

Figure 8 (i): (a) Magnetic anomaly across the profile DD' (drawn in Fig. 2) and depth  
 estimation by Continuous Wavelet Transform. (b) Depth estimation by  
 Daubechies wavelet.

This page contains no comments



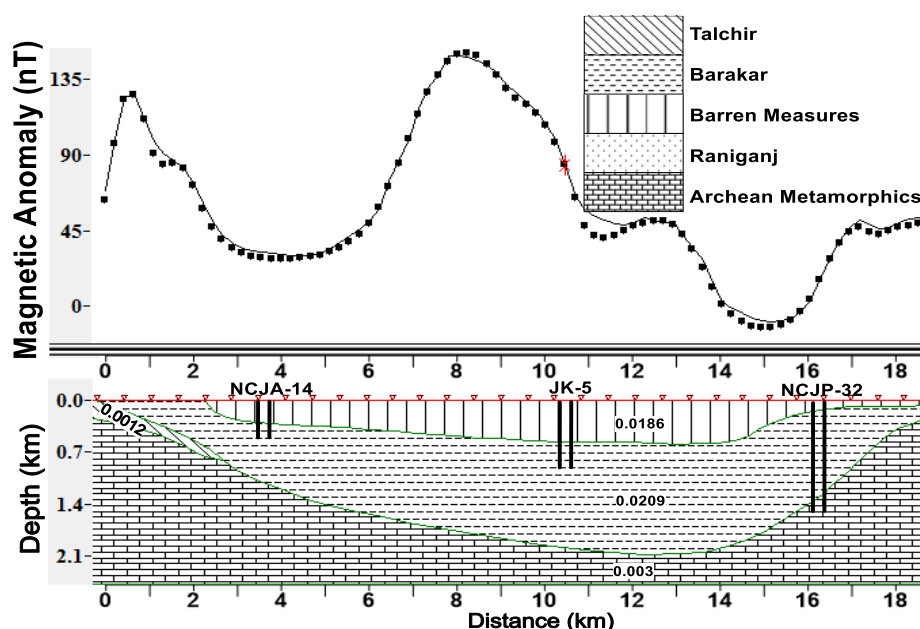

Figure 8 (ii): 2D model of the Profile DD' drawn in Fig. 2.

The mean depths of causative sources along the profile EE' (passes east of the Parbatpur and Dubrajpur and west of Dungri, Kustore region, shown in Fig. 2) calculated from the CWT [Fig. 9 (i) (a)] and Daubechies wavelet [Fig. 9 (i) (b)] varies from 1.8 km to 2.8 km. There is a gentle slope of the basin on the northern side, uplift of the basement in the southern part and steep slope close to the southern boundary fault is clearly indicated in this profile.

Magnetic Field Inclination, Declination and Azimuth Angle (clockwise from True North) of this profile are 36.39°, -0.12° and 268.556° respectively. Anomaly over this profile can be adequately explained because underlying body having susceptibility contrast with respect to its surrounding. The depth of the basement near the top pole is estimated about 1.5-1.6 km from the surface. Anomaly like the middle of the profile could be ascribed to the presence of basic or ultrabasic body which was a source for sills and basic dykes which intruded into basin during Precambrian age. The south pole of the underlying source is found to be at a depth of about 0.4 km and the north-pole at 0.7 km depth below the surface [Fig. 9 (ii)]. Eastern margin shows the impact of the occurrence

---

 Number: 1      Author: sanjay      Subject: Highlight      Date: 10/25/2016 11:31:08 AM

---

 Number: 2      Author: sanjay      Subject: Sticky Note      Date: 10/25/2016 7:19:27 AM  
is the adequately explained only in DD profile. as we can observe that a high suceptibility contrast exist in all profile.

---

 Number: 3      Author: sanjay      Subject: Highlight      Date: 10/25/2016 7:15:54 AM

---

 Number: 4      Author: sanjay      Subject: Replacement Text      Date: 10/25/2016 7:20:49 AM  
in place of hike author should use some appropriate terminology.

---

 Number: 5      Author: sanjay      Subject: Replacement Text      Date: 10/25/2016 7:22:13 AM  
what does mean by south pole and north pole.  
use appropriate word.

---

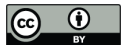

518 of some faults and extension of metamorphic runs under the sediments up to distance of  
 519 about 1.12 km.

520

521 Geological section along this profile are also deduced from the gravity data, bore  
 522 hole information and available geological informations. Individual thickness of each  
 523 formation is also deduced with the help of bore holes JK-4, NCJP-42, NCJP-16 and  
 524 NCJP-12 which are located south west of Kustor, west of Nunikdih, west of Dungri and  
 525 south of Dungri respectively. Maximum thickness is about 0.45 km for Barren-Measures,  
 526 about 1.5 km for Talchir and 1.4 km for Barakar formation have been inferred.

527

528

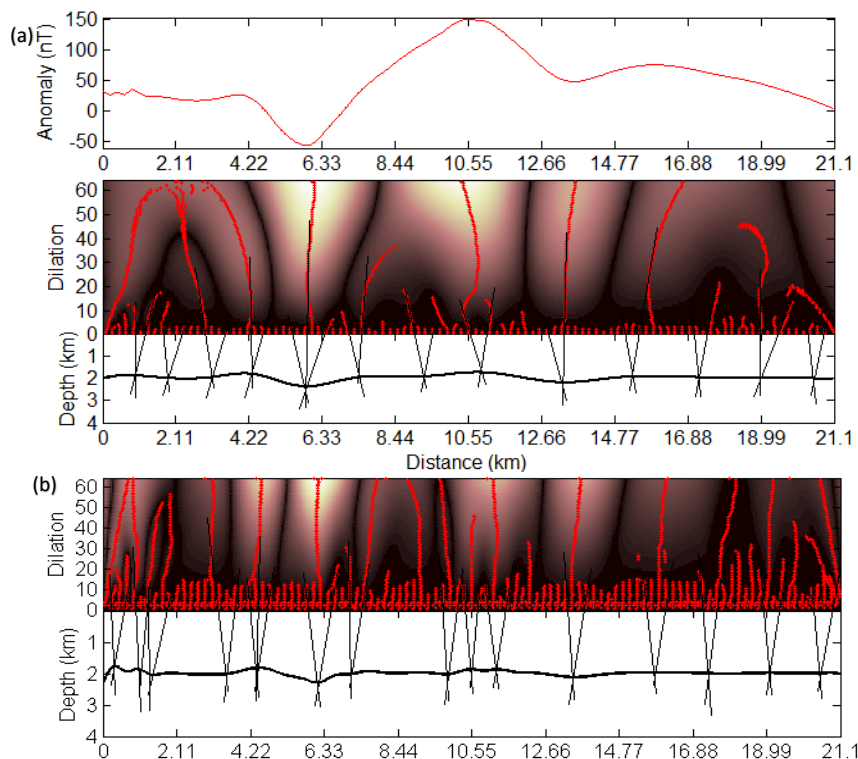

529

530

531 Figure 9 (i): (a) Magnetic anomaly across the profile EE' (drawn in Fig. 2) and depth  
 532 estimation by Continuous Wavelet Transform. (b) Depth estimation by  
 533 Daubechies wavelet.

This page contains no comments

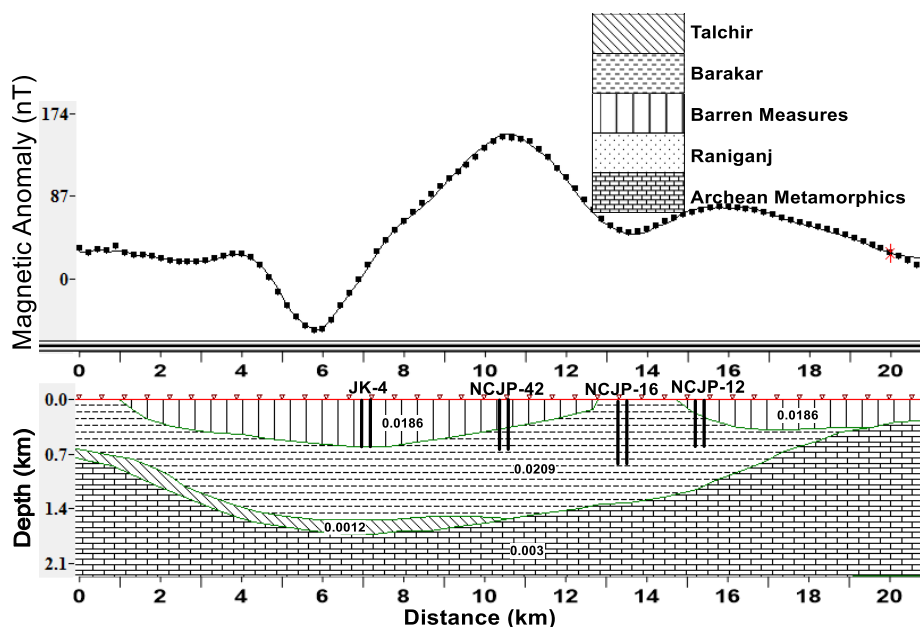

534

535 Figure 9 (ii): 2D model of the Profile EE' drawn in Fig. 2

536

537 The mean depths of causative sources along the profile FF' (passes east of the  
 538 Jharia, Dhanbad and west of the Makunda and Pathardih region, shown in Fig. 2)  
 539 calculated from the CWT [Fig. 10 (i) (a)] and Daubechies wavelet method [Fig. 10 (i)  
 540 (b)] varies from 1 km to 2.5 km. Also, magnetic anomaly suggest that this area is  
 541 geologically highly disturbed and dips of the formations varies rapidly.

542 Magnetic Field Inclination, Declination and Azimuth angle of this profile are  
 543 36.33°, -0.13° and 268.584° respectively. Patherdih horst which is tongue of gneisses  
 544 penetrates the south east corner of this region. There are strong faults occurs at both ends  
 545 of the profile. Several interesting possibilities arise regarding the basic intrusives of dykes  
 546 as well as schists which are normally magnetized. The hike in the anomaly of about 110  
 547 nT at middle of the profile is due to Peridotite dykes and sills having the close association  
 548 with Barren-Measure and Barakar formation.

549

550 It is found that in this region of magnetic anomaly remanent magnetization of the  
 551 body also appears to contribute to the magnetic anomaly. A number of sills and ultrabasic  
 552 dykes (mica peridotites) are found to be intrusive into the sediments. Geology over this





553 profile could be described to the presence of a basic or ultrabasic body which was main  
554 source for the sills and basic dykes intruded [Fig. 10 (ii)] into the basin during Gondwana  
555 times (Verma et al., 1973).

556

557 Geological strata along this profile are highly disturbed. Therefore, dip of the  
558 formations varies abruptly. The thickness of the formations is extrapolated from gravity  
559 data, bore holes NCJB-9, NCJB-25 and JFT-8 information as well as geological  
560 information. Bore hole NCJB-9, NCJB-25 and JFT-8 are located west of Chhatabad, west  
561 of Patherdih and west of Bhojudih respectively. Borehole JFT-8 has the cross contact  
562 between Barren-Measures and Barakar formation and it touches the metamorphics at  
563 about 0.4 km near west of Bhojudih. The depth of the individual formations are  
564 approximately equal to the depth obtained from interpretation of gravity data (Singh and  
565 Singh, 2015).

566

567

This page contains no comments



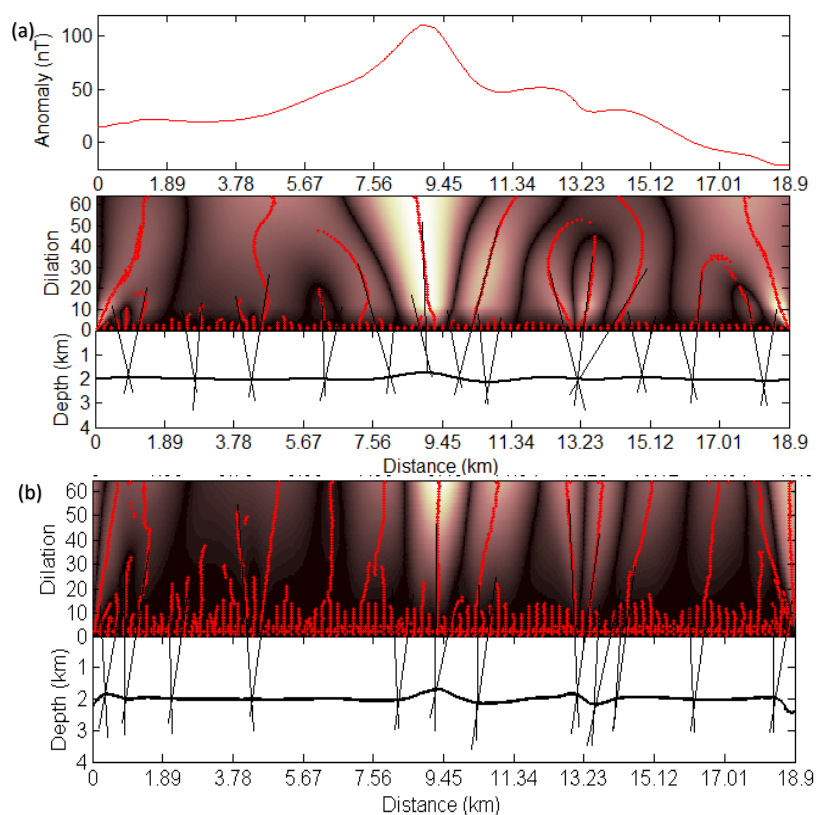

568  
 569 Figure 10 (i): (a) Magnetic anomaly across the profile FF' (drawn in Fig. 2) and depth  
 570 estimation by Continuous Wavelet Transform. (b) Depth estimation by  
 571 Daubechies wavelet.  
 572

This page contains no comments

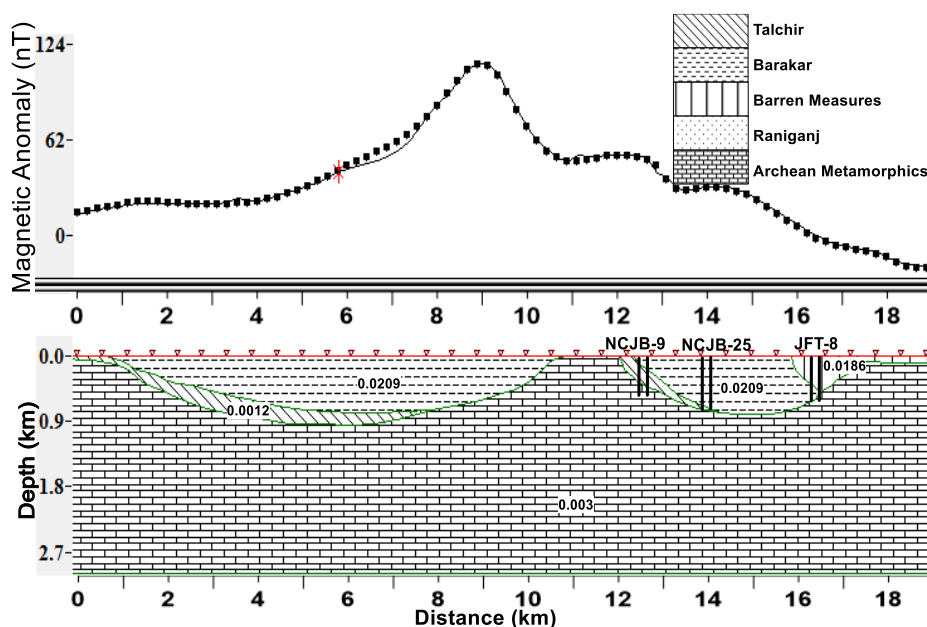

Figure 10 (ii): 2D model of the Profile FF' drawn in Fig. 2

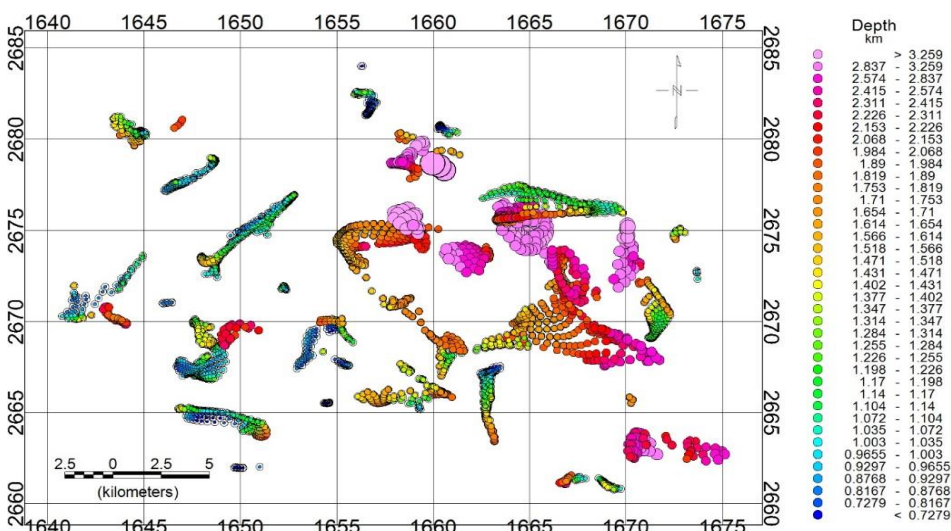

Figure 11: The depth estimates obtained from Euler deconvolution (SI=2) are plotted over I-TM coordinates of the study region.

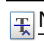

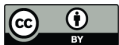

581 The interpretation of magnetic anomaly over Jharia coalfield compared with some  
582 information from interpretation of gravity data (Verma and Ghosh, 1974). The mean  
583 depth to the causative sources of magnetic anomaly estimated by Euler deconvolution  
584 method (Fig. 11) ranges about 0.6 km to 3.2 km. The mean depth of the profiles has been  
585 shown in the table 1.

586 ~~Algorithm of Euler deconvolution to the total magnetic field anomaly from the~~  
587 ~~Jharia coalfield (Fig. 2).~~ <sup>1</sup> ~~2~~ Magnetic field anomaly is predominantly due to irregular  
588 ~~fluctuation.~~ <sup>3</sup> Precambrian outcrops and faults. The magnetic data are sampled at roughly  
589 50 m along the profile direction. To enhance the signal to noise ratio, a high cut filter was  
590 applied in the wavenumber domain and partial derivative in the vertical direction was  
591 obtained by extending the field grid before the calculation. The SI is supposed to vary  
592 between 0 and 3 covering all plausible geological bodies. The estimates of source location  
593 and depth are obtained by minimizing the error function using nonlinear optimization  
594 technique of Coleman and Li (1996).

595 Fig. 11 shows two sets of fractures, predominantly oriented in the NE and SE at  
596 northern and southern boundary respectively. <sup>4</sup> The orientation of fracture set agrees with  
597 the orientation obtained from regional magnetic interpretation (Verma et al. 1973). In the  
598 southern region, the depth of the Precambrian basement derived from the faults <sup>5</sup> less  
599 than that in the northern region. Furthermore, intense fracturing is detected in the centre  
600 of the study area. In the western and southern region, the <sup>6</sup> source depth is shallow  
601 compared to that of the eastern and northern region.

602  
603 It suggesting that the most of <sup>7</sup> sediments lies below 700 m, which is reasonable as  
604 calculated by wavelet transform method. The intense fracturing at the <sup>8</sup> both north and  
605 south boundary grid produces sharp basement between them as observed in the  
606 <sup>9</sup> bathymetry. Thus, the faults and depths obtained from the Euler deconvolution, CWT and  
607 Daubechies wavelet are related to each other as results obtained from the regional  
608 magnetic interpretation.

609  
610  
611  
612

## Page: 31

|                                                                                                                                                                              |           |                |                           |                              |
|------------------------------------------------------------------------------------------------------------------------------------------------------------------------------|-----------|----------------|---------------------------|------------------------------|
|                                                                                              | Number: 1 | Author: sanjay | Subject: Sticky Note      | Date: 10/25/2016 9:56:30 AM  |
| is magnetic anomaly reflect the outcrops feature not the sediment or basement undulation effects?<br>remove the paragaph as it does not bring out any meaningful or rewrite. |           |                |                           |                              |
|                                                                                              | Number: 2 | Author: sanjay | Subject: Replacement Text | Date: 10/25/2016 9:52:45 AM  |
| what does mean by algothrim in fig 2. in complete sentence                                                                                                                   |           |                |                           |                              |
|                                                                                              | Number: 3 | Author: sanjay | Subject: Replacement Text | Date: 10/25/2016 9:54:04 AM  |
| undulation.                                                                                                                                                                  |           |                |                           |                              |
|                                                                                              | Number: 4 | Author: sanjay | Subject: Sticky Note      | Date: 10/25/2016 9:57:22 AM  |
| marks the circle in figure 11.                                                                                                                                               |           |                |                           |                              |
|                                                                                              | Number: 5 | Author: sanjay | Subject: Inserted Text    | Date: 10/25/2016 9:58:54 AM  |
| is basement is derived from the fault.                                                                                                                                       |           |                |                           |                              |
|                                                                                              | Number: 6 | Author: sanjay | Subject: Highlight        | Date: 10/25/2016 9:59:34 AM  |
|                                                                                              | Number: 7 | Author: sanjay | Subject: Highlight        | Date: 10/25/2016 10:00:15 AM |
|                                                                                              | Number: 8 | Author: sanjay | Subject: Highlight        | Date: 10/25/2016 10:01:21 AM |
|                                                                                              | Number: 9 | Author: sanjay | Subject: Highlight        | Date: 10/25/2016 10:00:08 AM |



Table 1: Mean depth of **1** **purces** calculated from magnetic anomaly by CWT and Daubechies wavelet along the profiles drawn over Jharia coal field and surrounding regions.

| Name of Profiles | Distance with depth (km) |     |      |      |      |     |     |
|------------------|--------------------------|-----|------|------|------|-----|-----|
|                  | 3                        | 6   | 9    | 12   | 15   | 18  | 21  |
| AA'              | 0.3                      | 0.4 | 0.38 | 0.37 | 0.39 | -   | -   |
| BB'              | 2                        | 2.4 | 2.2  | 2.5  | 1.8  | -   | -   |
| CC'              | 1.6                      | 1.7 | 1.2  | 1.9  | 2    | -   | -   |
| DD'              | 2.2                      | 2.8 | 1.7  | 1.8  | 2.3  | -   | -   |
| EE'              | 1.8                      | 2.8 | 1.8  | 2    | 1.7  | 1.9 | 2.1 |
| FF'              | 2.1                      | 2.2 | 1    | 1.7  | 1.8  | -   | -   |

Table 2: The following Magnetic susceptibility used to prepare the geological sections. Susceptibility values are taken from the standard chart compiled by Clark and Emerson (1991) and Hunt et al. (1995).

| Formation       | Litho-type                                                                                                     | Susceptibility (SI unit)                                                                          |
|-----------------|----------------------------------------------------------------------------------------------------------------|---------------------------------------------------------------------------------------------------|
| Raniganj        | Fine grained feldspathic sandstones, shales with coal seams                                                    | Sandstone=0.0209<br>Shale=0.0186<br>Coal=0.000025                                                 |
| Barren Measures | Buff- coloured sandstones, shales and carbonaceous shales                                                      | Sandstone=0.0209<br>Shale=0.0186                                                                  |
| Barakar         | Buff-coloured coarse and medium-grained feldspathic sandstones, carbonaceous shales, fire clays and coal seams | Sandstone=0.0209<br>Shale=0.0186<br>Clay=0.00025<br>Coal=0.000025                                 |
| Talchir         | Silt, Carbonates<br>Greenish shale and fine grained sandstones                                                 | Silt/Carbonates=0.0012<br>Shale=0.0186<br>Sandstone=0.0209                                        |
| Metamorphics    | Granite Gneisses, quartzites, mica schists and amphibolites                                                    | Granite=0.05<br>Gneisses=0.025<br>Quartzites=0.0044<br>Mica schists=0.003<br>Amphibolites=0.00075 |

---

 Number: 1      Author: sanjay      Subject: Highlight      Date: 10/25/2016 10:04:06 AM

---

source of what?

what is number along AA'

pl check the unit of depth. is it in km.





## 627        **8. Conclusions**

628            It has been shown that CWT allows estimation of the position of the buried source  
629 anomalies. For large dilations, the modulus maxima of the CWT and Daubechies wavelet  
630 of the magnetic anomalies contain the main features of the location and depth information  
631 of anomalous body in the magnetic anomaly. The study over Jharia coal field proves the  
632 CWT and Daubechies wavelet method are very efficient to explain the positions of  
633 causative sources of potential field (magnetic) data. Extrema lines of these wavelet  
634 transforms give satisfactory and reliable informations required to enhance the key  
635 parameters of the sources depth and locations.

636  
637            The application of the CWT to the synthetic and field magnetic data over Jharia coal  
638 fields and surrounding regions demonstrates that the CWT and Euler deconvolution [Fig.  
639 16] methods are rapid, easy to execute. **1]ean depth of causative sources of potential field**  
**640 data** obtained from CWT can help to improve qualitative and quantitative interpretation.  
641 Also, CWT and Euler deconvolution provide shape of causative sources without any prior  
642 knowledge. These methods can play an important role in constructing initial models  
643 required for 2-D and 3-D or joint inversion of gravity and magnetic anomalies with better  
644 accuracies in very short period.

645  
646  
647  
648  
649  
650  
651  
652  
653  
654  
655  
656  
657  
658

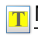



659 **9. References**

- 660 Ardestani, E. V., 2010, Precise Edge detection of gravity anomalies by Tilt angle filters,  
 661 Journal of the Earth & Space Physics, 36, 2, 11-19.
- 662 Barbosa, V. C. F., Silva, J. B. C. and Medeiros, W. E., 1999, Stability analysis and  
 663 improvement of structural index estimation in Euler deconvolution, Geophysics, 64,  
 664 48-60.
- 665 Blakely, R.J., and Simpson, R.W., 1986, Approximating edges of source bodies from  
 666 magnetic or gravity anomalies, Geophysics, 51 (7), 1494-1498.
- 667 Bhattacharyya, B. P., 1972, Tectono-metamorphic effect of granite and pegmatite  
 668 emplacement in the Precambrian of Bihar Mica Belt. Proc. Symp. On Metallogeny  
 669 of the Precambrian. Geological Society of India, Bangalore 45-56.
- 670 Bott, M. H. P. and Ingles, A., 1972, Matrix methods for joint interpretation of two-  
 671 dimensional gravity and magnetic anomalies with application to the Iceland- Faeroe  
 672 Ridge, Geophys. J. Roy. Astr. Soc., 30, 55-67.
- 673 Chamoli, A., Srivastava, R. P. and Dimri, V. P., 2006, Source depth characterization of  
 674 potential field data of Bay of Bengal by continuous wavelet transform, Indian  
 675 Journal of Marine Sciences, 35(3), 195-204.
- 676 Clark, D.A., and Emerson, D.W., 1991, Notes on rock magnetization characteristics in  
 677 applied geophysical studies, Exploration Geophysics, 22, 547-55.
- 678 Cooper, G. R. J., 2004, A semi-automatic procedure for the interpretation of geophysical  
 679 data, Exploration Geophysics, 35, 180-185.
- 680 Cooper, G. R. I. and Cowan, D. R., 2006, Enhancing potential field data using filters  
 681 based on the local phase, Comp. & Geoscience, 32, 1585-1591.
- 682 Cooper, G. R. J. and Cowan Duncan R., 2008, Edge enhancement of potential field data  
 683 using normalized statistics, Geophysics, 73(3), H1-H4.
- 684 Cooper, G. R. J., 2011, The semiautomatic interpretation of gravity profile data. Comp.  
 685 & Geoscience, 37, 1102-1109.

This page contains no comments



- 686 Coleman, T. F. and Y. Li., 1996, An interior, trust region approach for nonlinear  
687 minimization subject to bounds, SIAM J. on Optimization, 6, 418-445.
- 688 Dewangan, P., Ramprasad, T., Ramana, M. V., Desa, M. and Shailaja, B., 2007,  
689 Automatic interpretation of magnetic data using Euler deconvolution with nonlinear  
690 background, Pure and Applied Geophysics, 164, 2359-2372.
- 691 Fernández Martínez, J. L., Fernández Muñoz, Z., Pallero, J. L. G., Pedruelo González, L.  
692 M., 2013, From Bayes to Tarantola: New insights to understand uncertainty in  
693 inverse problems, Journal of Applied Geophysics, 98, 62-72.
- 694 Fernández Martínez, J. L., Fernández Muñoz, M. Zulima., Tompkins, Michael J., 2012,  
695 On the topography of the cost functional in linear and nonlinear inverse problems,  
696 Geophysics, 77, W1-W15.
- 697 FitzGerald, D., Reid A., and McInerney, P., 2004, New discrimination techniques for  
698 Euler deconvolution, Comp. & Geoscience, 30, 461-469.
- 699 Fox, C. S., 1930. The Jharia Coal Field, Geological Survey of India, Memoir, 56, 253.
- 700 Gallardo Delgado, L. A., Perez Flores, M. A. and Gomez Trevino, E., 2003, A versatile  
701 algorithm for joint 3D inversion of gravity and magnetic data, Geophysics, 68, 949-  
702 959.
- 703 Gerovska, D. and Arauzo Bravo, M. J., 2003, Automatic interpretation of magnetic data  
704 based on Euler deconvolution with unprescribed structural index, Comp. &  
705 Geoscience, 29, 949-960.
- 706 Gee, E. R., 1932, The geology and coal resources of the Raniganj coalfield, Mem. Geol.  
707 Surv. India, 61, 1-343.
- 708 Goyal, P. and Tiwari, V. M., 2014, Application of the continuous wavelet transform of  
709 gravity and magnetic data to estimate sub-basalt sediment thickness, Geophysical  
710 Prospecting, 62, 148-157.
- 711 Gunn, P. J., 1975, Linear transformations of gravity and magnetic fields, Geophysical  
712 Prospecting, 23, 300-312.

This page contains no comments



- 713 Hunt, C. P., Moskowitz, B.M. and Banerjee, S.K., 1995, Magnetic properties of Rocks  
 714 and Minerals, In: Rock Physics and Phase Relations - A hand book of Physical  
 715 constants, AGU Reference shelf 3, ed. Ahrens, T. J., 189-204.
- 716 Hsu, S. K., Sibuet, J. C. and Shyu, C. T., 1996, High resolution detection of geologic  
 717 boundaries from potential-field anomalies: an enhanced analytic signal: technique,  
 718 Geophysics, 61, 373-386.
- 719 Hsu, S. K., 2002, Imaging magnetic sources using Euler's equation, Geophysical  
 720 Prospecting, 50, 15-25.
- 721 Holschneider, M., A. Chambodut, and M. Mandea, 2003, From global to regional analysis  
 722 of the magnetic field on the sphere using wavelet frames, Physics of the Earth and  
 723 Planetary Interiors, 135, 107-124.
- 724 Jiang Fan, Wu Jiansheng and Wang Jialin, 2008, Joint inversion of gravity and magnetic  
 725 data for a two-layer model, Applied Geophysics, 5, 331-339.
- 726 Keating, P. B., 1998, Weighted Euler deconvolution of gravity data, Geophysics, 63,  
 727 1595-1603.
- 728 Kopal, Z., 1961, Numerical analysis, Chapman and Hall Ltd., London, 551-553.
- 729 Melo, F. F., Barbosa, V. C. F., Uieda, L., Oliveira Jr, V. C. and Silva, J. B. C., 2013,  
 730 Estimating the nature and the horizontal and vertical positions of 3D magnetic  
 731 sources using Euler deconvolution, Geophysics, 78, J87-J98.
- 732 Menichetti, V., and Guillen, A., 1983, Simultaneous interactive magnetic and gravity  
 733 inversion, Geophysical Prospecting, 31, 929-994.
- 734 Moreau, F., Gibert, D., Holschneider, M. and Saracco, G., 1997, Wavelet analysis of  
 735 potential fields, Inverse Problems, 13, 165-178.
- 736 Moreau, F., Gibert, D., Holschneider, M., and Saracco, G., 1999, Identification of sources  
 737 of potential fields with continuous wavelet transform: Basic theory, Journal of  
 738 Geophysical Research, 104, 5003-5013.

This page contains no comments





- 739 Mushayandebvu, M. F., Van, Driel P., Reid, A. B., and Fairhead, J. D., 2001, Magnetic  
740 source parameters of two dimensional structures using extended Euler  
741 deconvolution, *Geophysics*, 66, 814-823.
- 742 Mushayandebvu, M. F., Lesur, V., Reid, A. B., and Fairhead, J. D., 2004, Grid Euler  
743 deconvolution with constraints for 2D structures, *Geophysics*, 69, 489-496.
- 744 Perez, Wijns, C. C. and Kowalczyk, P., 2005, Theta map: Edge detection in magnetic  
745 data: *Geophysics*, 70(4), L39-L43.
- 746 Pilkington, M., 2006, Joint inversion of gravity and magnetic data for two layer models,  
747 *Geophysics*, 71, 35-42.
- 748 Raja Rao, C. S., 1987, Coalfield of India, v.IV (pt.1) *Bull. Geol. Surv. India, Series A*,  
749 45, 336.
- 750 Ravat, D., 1996, Analysis of the Euler method and its applicability in environmental  
751 investigations, *Journal of Environmental and Engineering Geophysics*, 1, 229-238.
- 752 Reid, A. B., Allsop, J. M., Granser, H., Millet, A. J. and Somerton, I. W., 1990, Magnetic  
753 interpretation in three dimensions using Euler deconvolution, *Geophysics*, 55, 80-  
754 91.
- 755 Reid, A. B., Ebbing, J. and Webb, S. J., 2014, Avoidable Euler Errors- the use and abuse  
756 of Euler deconvolution applied to potential field, *Geophysical Prospecting*, 62,  
757 1162-1168.
- 758 Salem, A., Williams, S., Fairhead, J. D., Ravat, D. and R. Smith, 2007, Tilt-depth method:  
759 a simple depth estimation method using first order magnetic derivatives, *The*  
760 *Leading Edge*, 26/12, 1502-1505.
- 761 Sailhac, P., Gibert, D. and Boukerbout, H., 2009, The theory of the continuous wavelet  
762 transform in the interpretation of potential fields: A review, *Geophysical*  
763 *Prospecting*, 57, 517-525.
- 764 Silva, J. B. C., Barbosa, V. C. F. and Medeiros, W. E., 2001, Scattering, symmetry, and  
765 bias analysis of source position estimates in Euler deconvolution and its practical  
766 implications, *Geophysics*, 66, 1149-1156.

This page contains no comments



- 767 Silva, J. B. C. and Barbosa, V. C. F., 2003, 3D Euler deconvolution: Theoretical basis for  
768 automatically selecting good solutions, *Geophysics*, 68, 1962-1968.
- 769 Singh, A. and Singh, U. K., 2015, Wavelet analysis of residual gravity anomaly profiles:  
770 Modeling of Jharia coal basin, India, 86 (6), 679–686.
- 771 Stavrev, P. and Reid, A., 2007, Degrees of homogeneity of potential fields and structural  
772 indices of Euler deconvolution, *Geophysics*, 72, L1-L12.
- 773 Stavrev, P. Y., 1997, Euler deconvolution using differential similarity transformations of  
774 gravity or magnetic anomalies, *Geophysical Prospecting*, 45, 207-246.
- 775 Thompson, D. T., 1982, EULDPH: A new technique for making computer assisted depth  
776 estimates from magnetic data, *Geophysics*, 47 (1), 31-37.
- 777 Verma, R. K., Bhuin, N. C. and Mukhopadhyay, M., 1979, Geology, Structure and  
778 tectonics of Jharia Coal Field, India- A 3-D Model, *Geoexploration*, 17, 305-324.
- 779 Verma, R. K. and Ghosh, D., 1974, Gravity survey over Jharia coalfield, India. *Geophys.*  
780 *Res. Bull.*, 12, 165-175.
- 781 Verma, R. K., Majumdar, R., Ghosh, Debabrata, Ghosh, Ashish and Gupta, N. C., 1976,  
782 Results of Gravity Survey over Raniganj Coalfield, India, *Geophysical Prospecting*,  
783 24, 19-30.
- 784 Verma, R. K., Prasad, S. N. and Jha, B. P., 1973, Magnetic Survey over Jharia Coal Field,  
785 *Pure and Applied Geophysics*, 102 (1), 124-133.
- 786 Williams, S., Fairhead, J. D. and Flanagan, G., 2003, Grid based Euler deconvolution:  
787 Completing the circle with 2D constrained Euler, *SEG Technical Program*  
788 *Expanded Abstracts*, 22, 576-579.
- 789 Wu, J. S., Jiang, F. and Wang, J. L., 2007, Study of joint inversion of gravity and magnetic  
790 data for variable density interface model, *Proceeding of Annual of the Chinese*  
791 *Geophysical Society*, 633.
- 792 Zeyen, H. and J. Pous, 1993, 3-D joint inversion of magnetic and gravimetric data with a  
793 priori information, *Geophysical Journal International*, 112, 244-256.

This page contains no comments



- 794 Zhang, C., Mushayandebvu, M. F., Reid, A. B., Fairhead, J. D. and Odegard, M. E., 2000,  
795 Euler deconvolution of gravity tensor gradient data, *Geophysics*, 65, 512-520.
- 796 Zhang, G. B., Shen, N. H., Wang, X. C. and Wang, H. X., 1993, The program system on  
797 generalized linear cooperative inversion of the potential anomalies, *Journal of*  
798 *Changchun University (Earth Sciences)*, 23(2), 197-204.

This page contains no comments
